# Supplementary material
Source: MDPI journal article supplement (https://www.mdpi.com/2673-396X/3/3/41)
Supplement: s1 [file s1]

## Supplementary Material

Supplementary Table S1. Clinical and pathological data of 152 DTC patients stratified by disease status at last follow-up.

| Clinical and pathological characteristics | No Evidence of Disease (N=133) | Persistence or Relapse of Disease (N=19) | P value                  |
|-------------------------------------------|--------------------------------|------------------------------------------|--------------------------|
| Female gender, N                          | 110 (82.7)                     | 13 (68.4)                                | 0.138 <sup>†</sup>       |
| Age at DTC diagnosis, yr                  | 44 ± 13 (36-52)                | 40 ± 16 (28-54)                          | 0.269                    |
| Follow-up duration, yr                    | 9.4 ± 6.2 (4-14)               | 6.2 ± 5.6 (2-10)                         | <b>0.007</b>             |
| Post-operative RAI administration, N      | 113 (85.0)                     | 18 (94.7)                                | 0.362 <sup>†</sup>       |
| Multifocality, N                          | 27 (20.3)                      | 6 (31.6)                                 | 0.265 <sup>†</sup>       |
| Lymph node metastases, N                  | 24 (18.0)                      | 4 (21.1)                                 | 0.831 <sup>†</sup>       |
| Maximum tumor size, mm                    | 24.3 ± 12.6 (15-30)            | 25.8 ± 13.2 (15-30)                      | 0.692                    |
| PTC Histology, N                          | 123 (92.4)                     | 16 (84.2)                                |                          |
| Aggressive subtypes                       | 19 (15.4)                      | 6 (37.5)                                 | 0.057 <sup>†</sup>       |
| FTC Histology, N                          | 6 (4.5)                        | 1 (5.2)                                  | 0.884 <sup>†</sup>       |
| OCA Histology, N                          | 4 (3.0)                        | 2 (10.5)                                 | 0.115 <sup>†</sup>       |
| Angioinvasion, N                          | 11 (8.2)                       | 5 (26.3)                                 | <b>0.017<sup>†</sup></b> |
| Extrathyroidal Extension, N               | 25 (18.7)                      | 9 (47.3)                                 | <b>0.005<sup>†</sup></b> |
| Microscopic                               | 25 (100)                       | 5 (55.6)                                 |                          |
| Initial risk category, N                  |                                |                                          |                          |
| <u>AJCC/TNM 7<sup>th</sup> Edition</u>    |                                |                                          |                          |
| Stage I                                   | 96 (72.2)                      | 12 (63.2)                                |                          |
| Stage II                                  | 18 (13.5)                      | 1 (5.3)                                  |                          |
| Stage III                                 | 15 (11.3)                      | 4 (21.1)                                 |                          |
| Stage IVa                                 | 4 (3.0)                        | 1 (5.3)                                  | <b>0.049<sup>†</sup></b> |
| Stage IVb                                 | 0 (0)                          | 0 (0)                                    |                          |
| Stage IVc                                 | 0 (0)                          | 1 (5.3)                                  |                          |
| <u>AJCC/TNM 8<sup>th</sup> Edition</u>    |                                |                                          |                          |
| Stage I                                   | 121 (91.0)                     | 15 (78.9)                                |                          |
| Stage II                                  | 11 (8.3)                       | 3 (15.8)                                 |                          |
| Stage III                                 | 1 (0.7)                        | 0 (0)                                    | <b>0.038<sup>†</sup></b> |
| Stage IVa                                 | 0 (0)                          | 0 (0)                                    |                          |
| Stage IVb                                 | 0 (0)                          | 1 (5.3)                                  |                          |
| <u>ATA risk classification</u>            |                                |                                          |                          |
| Low                                       | 77 (57.9)                      | 5 (26.3)                                 |                          |
| Intermediate                              | 50 (37.6)                      | 10 (52.6)                                | <b>0.004<sup>†</sup></b> |
| High                                      | 6 (4.5)                        | 4 (21.1)                                 |                          |

RAI, radioiodine; AJCC/TNM: American Joint Cancer Committee on tumor-node-metastasis stage; ATA: American Thyroid Association. PTC: papillary thyroid carcinoma; FTC, follicular thyroid carcinoma; OCA, oncocytic carcinoma. Continuous traits are expressed as Mean ± SD (range) and compared with the Mann-Whitney test. Categorical traits are expressed as N (%) and compared with the Chi squared test (<sup>†</sup>). Bold values denote statistical significance at P level < 0.05.
