# Supplementary material
Source: MDPI journal article supplement (https://www.mdpi.com/2673-396X/3/3/41)
Supplement: s1 [file s1]

Archive with 1 entries (1 files):
- endocrines-1774710-supplementary.pdf
